# Supplementary material for: Elevated Risk of Osteoporosis for Vegetarian Modified by Smoking and Milk Consumption
Source: Research Square preprint supplement (doi:10.21203/rs.3.rs-7952087/v1), 2025-12-03
Supplement: Supplementary file 1 [file fe91d506b60aba6ea9556d9d.docx]

**Supplementary File 1. Community Health Services Questionnaire**

**Section 1. Lifestyle**

**1. Do you smoke?**

□ 0. Never
□ 1. Quit (Age started: ___; Average cigarettes per day: ___; Years since quitting: ___)
□ 2. Currently smoke (Age started: ___; Average cigarettes per day: ___; Time after waking before first cigarette: ___)
If currently smoke, are you seriously considering quitting?
□ 0. No □ 1. Within 6 months □ 2. Within 1 month

**2. Do you chew betel nut??**

□ 0. Never
□ 1. Quit (Age started: ___; Average pieces per day: ___; Years since quitting: ___)
□ 2. Currently chew (Age started: ___; Average pieces per day: ___)

**3. Do you drink alcohol?**

□ 0. Never
□ 1. Quit (Age started: ___; Type of alcohol: ___)
 Average frequency: ___ times per week; ___ cups per time (Type: ___)
□ 2. Currently drink (Age started: ___; Type of alcohol: ___)
 Average frequency: ___ times per week; ___ cups per time (One cup ≈ 240 c.c.)

**3-1. Have you ever experienced facial flushing after drinking one cup of beer?**

□ 0. Never □ 1. Sometimes □ 2. Always

**3-2. During your first two years of alcohol exposure, did you experience facial flushing after drinking one cup of beer?**

□ 0. Never □ 1. Sometimes □ 2. Always

**4. Do you exercise regularly?**

□ 0. No □ 1. Yes → On average, ___ days per week, ___ minutes per session

**5. Have you undergone a health examination within the past year?**

□ 0. No □ 1. Yes → When? Year: ______ Month: ______
 Type of health examination:
 □ 1. Adult health exam □ 2. Labor health exam □ 3. Women’s health exam □ 4. Elderly health exam □ 5. Other: __________
 Examination items:
 □ 1. X-ray □ 2. Blood test □ 3. Urine test □ 4. Pap smear □ 5. Other: __________

**6. Do you brush your teeth in the morning and at night?**

□ 0. No □ 1. Yes

**7. Do you weigh yourself monthly?**

□ 0. No □ 1. Yes

**8. What is your occupation?**

_________________________ (e.g., pest control worker, chef, carpenter, service worker)

**9. How physically demanding is your current job?**

□ 1. Light (e.g., housework, taxi driver, salesperson, welder, assembly worker)
□ 2. Moderate (e.g., technician, tool operator)
□ 3. Heavy (e.g., miner, steel worker, furnace operator)
□ 4. Very heavy (e.g., lumberjack, construction worker, cargo mover)

**10. How often do you eat breakfast?**

□ 0. Never □ 1. Daily □ 2. 5–6 times per week □ 3. 3–4 times per week □ 4. 1–2 times per week

**11. How often do you eat lunch outside?**

□ 0. Never □ 1. Daily □ 2. 5–6 times per week □ 3. 3–4 times per week □ 4. 1–2 times per week

**12. How often do you eat dinner outside?**

□ 0. Never □ 1. Daily □ 2. 5–6 times per week □ 3. 3–4 times per week □ 4. 1–2 times per week

**13. Do you usually eat snacks in addition to your three main meals?**

□ 0. Never □ 1. Daily □ 2. 5–6 times per week □ 3. 3–4 times per week □ 4. 1–2 times per week

**14. Do you usually take vitamin supplements?**

□ 0. Never □ 1. Daily □ 2. 5–6 times per week □ 3. 3–4 times per week □ 4. 1–2 times per week

If yes, please select the types of vitamins you take (you may select more than one):
□ Vitamin A □ Vitamin B □ Vitamin C □ Vitamin D □ Vitamin E □ Multivitamin
*(Please answer based on your use during the past six months.)*

**15. How often do you consume energy drinks?**

□ 0. Never □ 1. Daily □ 2. 5–6 times per week □ 3. 3–4 times per week □ 4. 1–2 times per week

If yes, which brands do you usually drink? (You may select more than one)
□ Red Bull □ VitaBull □ Monster □ Pocari Sweat □ Other: ________

**16. Do you use over-the-counter cold medications?**

□ 0. Never □ 1. Daily □ 2. 5–6 times per week □ 3. 3–4 times per week □ 4. 1–2 times per week □ 5. Only when having cold symptoms

**17. Do you** **take sleeping pills?**

□ 0. Never □ 1. Daily □ 2. 5–6 times per week □ 3. 3–4 times per week □ 4. 1–2 times per week

**Section 2. Dietary Habits**

**1. Are you a vegetarian?**

□ 0. No □ 1. Yes □ 2. Partially (e.g., vegetarian on the 1st and 15th day of the lunar month or for breakfast only)

**2. Has your vegetarian diet ever changed?**

□ 0. No □ 1. Yes (If yes, continue to Section 8: Vegetarian Dietary Change)

**3. What is your main reason for following a vegetarian diet?**

□ 0. Health reasons □ 1. Environmental reasons □ 2. Family reasons □ 3. Religious or cultural reasons □ 4. Other: _________

**4. What type of vegetarian diet do you follow?**

□ 0. Vegan (no animal products) □ 1. Lacto-vegetarian (consumes milk, no eggs) □ 2. Ovo-vegetarian (consumes eggs, no dairy) □ 3. Lacto-ovo vegetarian (consumes milk and eggs, no meat) □ 4. Pescatarian (consumes seafood, no meat)

**5. How long have you been a vegetarian?**

□ 0. Less than 1 year □ 1. 1–1.5 years □ 2. 1.5–5 years □ 3. 5–10 years □ 4. 10–15 years □ 5. More than 15 years

**6. Which foods do you consume most frequently? (Please select 3)**

□ 0. Eggs □ 1. Milk □ 2. Grains □ 3. Fruits □ 4. Vegetables □ 5. Beans □ 6. Water □ 7. Bread □ 8. Nuts □ 9. Meat substitutes □ 10. Seaweed

**7. How many bowls of rice or noodles do you eat per meal on average?**

□ 0. None □ 1. 1–2 bowls □ 2. 3 bowls □ 3. 4 bowls □ 4. 5 bowls or more

**8. How many bowls of vegetables do you eat per meal on average?**

□ 0. None □ 1. 1–2 bowls □ 2. 3 bowls □ 3. 4 bowls □ 4. 5 bowls or more

**9. How many servings of meat do you eat per day on average?**

□ 0. None □ 1. 1 piece □ 2. 2 pieces □ 3. 3 pieces □ 4. 4 pieces or more
*(One medium fruit ≈ 100 g)*

**10. What kind of cooking oil do you use most often? (Rank 1–3)**

□ 0. Salad oil □ 1. Lard □ 2. Sesame oil □ 3. Peanut oil □ 4. Soybean oil □ 5. Corn oil □ 6. Olive oil □ 7. Other: _________

**11. During the past six months, how often did you consume the following foods?**

*(Please tick the appropriate box in each row.)*

|  | **(1)**  **Every day** | **(2)**  **5–6 times/week** | **(3)**  **3–4 times/week** | **(4)**  **1–2 times/week** | **(5)**  **Rarely or never** |
| --- | --- | --- | --- | --- | --- |
| (1) How many times per week do you eat fish or seafood (e.g., shrimp, crab, squid, shellfish)? | ☐ | ☐ | ☐ | ☐ | ☐ |
| (2) How many times per week do you eat soy-based products (e.g., tofu, dried tofu, soy milk) or egg products? | ☐ | ☐ | ☐ | ☐ | ☐ |
| (3) How many times per week do you eat fruit? | ☐ | ☐ | ☐ | ☐ | ☐ |
| (4) How many times per week do you drink milk, soy milk, or yogurt (1 cup ≈ 240 c.c.)? | ☐ | ☐ | ☐ | ☐ | ☐ |
| (5) How many times per week do you drink sweetened beverages (e.g., soda, cola, milk tea, juice, smoothies)? | ☐ | ☐ | ☐ | ☐ | ☐ |
| (6) How many times per week do you drink coffee (1 cup ≈ 240 c.c.)? *(You may select more than one type)* □ Black coffee □With milk □ With creamer □ With sugar | ☐ | ☐ | ☐ | ☐ | ☐ |
| (7) How many times per week do you drink tea (1 cup ≈ 240 c.c.)?  (You may select more than one type)  □ Loose tea leaves □ Tea bags □  Bottled/canned tea (□ Green tea □ Black tea □ Oolong tea) □ Other: _________ | ☐ | ☐ | ☐ | ☐ | ☐ |

**Section 3. Family History**

Please indicate whether any of your grandparents, parents, or siblings have ever been diagnosed with the following diseases. If yes, please specify **who** and their **age at diagnosis**. If the individual is deceased, please provide their **age of death**. If the age is unknown, mark “V” in the box..

□ None of my relatives have been diagnosed with the listed cancers.

| **I. Cancer (Please refer to the cancer type codes (1)–(17) listed below the table, fill in: age at diagnosis / age at death)** | | | | | | | | | | | | | | | | | | |
| --- | --- | --- | --- | --- | --- | --- | --- | --- | --- | --- | --- | --- | --- | --- | --- | --- | --- | --- |
|  | **(1)** | **(2)** | **(3)** | **(4)** | **(5)** | **(6)** | **(7)** | **(8)** | **(9)** | **(10)** | **(11)** | **(12)** | **(13)** | **(14)** | **(15)** | **(16)** | **(17)** |
| **A-1. Relation**  ___________________ | ☐ | ☐ | ☐ | ☐ | ☐ | ☐ | ☐ | ☐ | ☐ | ☐ | ☐ | ☐ | ☐ | ☐ | ☐ | ☐ | ☐ |
| **A-2. Age at diagnosis** | ☐ | ☐ | ☐ | ☐ | ☐ | ☐ | ☐ | ☐ | ☐ | ☐ | ☐ | ☐ | ☐ | ☐ | ☐ | ☐ | ☐ |
| **A-3. Age at death** | ☐ | ☐ | ☐ | ☐ | ☐ | ☐ | ☐ | ☐ | ☐ | ☐ | ☐ | ☐ | ☐ | ☐ | ☐ | ☐ | ☐ |
| **B-1. Relation** | ☐ | ☐ | ☐ | ☐ | ☐ | ☐ | ☐ | ☐ | ☐ | ☐ | ☐ | ☐ | ☐ | ☐ | ☐ | ☐ | ☐ |
| **B-2. Age at diagnosis** | ☐ | ☐ | ☐ | ☐ | ☐ | ☐ | ☐ | ☐ | ☐ | ☐ | ☐ | ☐ | ☐ | ☐ | ☐ | ☐ | ☐ |
| **B-3. Age at death** | ☐ | ☐ | ☐ | ☐ | ☐ | ☐ | ☐ | ☐ | ☐ | ☐ | ☐ | ☐ | ☐ | ☐ | ☐ | ☐ | ☐ |

(1) Cervical cancer (2) Breast cancer (3) Liver cancer (4) Lung cancer (5) Colorectal cancer (6) HNPCC (7) Stomach cancer (8) Oral cancer

(9) Prostate cancer (10) Bladder cancer (11) Pancreatic cancer (12) Ovarian cancer (13) Nasopharyngeal cancer (14) Esophageal cancer

(15) Hematologic malignancy (e.g., leukemia) (16) Gastric cancer (17) Other (please specify)

| **II. Other Diseases (Please refer to the Other Diseases codes (1)–(17) listed below the table, fill in: age at diagnosis / age at death. If age is unknown, mark “V”.) ☐ None of the following diseases** | | | | | | | | | | | | | | | | | |
| --- | --- | --- | --- | --- | --- | --- | --- | --- | --- | --- | --- | --- | --- | --- | --- | --- | --- |
|  | **(1)** | **(2)** | **(3)** | **(4)** | **(5)** | **(6)** | **(7)** | **(8)** | **(9)** | **(10)** | **(11)** | **(12)** | **(13)** | **(14)** | **(15)** | **(16)** | **(17)** |
| **A-1. Relation**  **__________________** | ☐ | ☐ | ☐ | ☐ | ☐ | ☐ | ☐ | ☐ | ☐ | ☐ | ☐ | ☐ | ☐ | ☐ | ☐ | ☐ | ☐ |
| **A-2. Age at diagnosis** | ☐ | ☐ | ☐ | ☐ | ☐ | ☐ | ☐ | ☐ | ☐ | ☐ | ☐ | ☐ | ☐ | ☐ | ☐ | ☐ | ☐ |
| **A-3. Age at death** | ☐ | ☐ | ☐ | ☐ | ☐ | ☐ | ☐ | ☐ | ☐ | ☐ | ☐ | ☐ | ☐ | ☐ | ☐ | ☐ | ☐ |
| **B-1. Relation** | ☐ | ☐ | ☐ | ☐ | ☐ | ☐ | ☐ | ☐ | ☐ | ☐ | ☐ | ☐ | ☐ | ☐ | ☐ | ☐ | ☐ |
| **B-2. Age at diagnosis** | ☐ | ☐ | ☐ | ☐ | ☐ | ☐ | ☐ | ☐ | ☐ | ☐ | ☐ | ☐ | ☐ | ☐ | ☐ | ☐ | ☐ |
| **B-3. Age at death** | ☐ | ☐ | ☐ | ☐ | ☐ | ☐ | ☐ | ☐ | ☐ | ☐ | ☐ | ☐ | ☐ | ☐ | ☐ | ☐ | ☐ |

(1) Diabetes (2) Hypertension (3) Cerebrovascular disease / Stroke (4) Cardiovascular disease / Heart disease (5) Kidney disease (including dialysis)

(6) Chronic hepatitis / Liver cirrhosis (7) Prostatic hypertrophy (8) Colorectal polyps (9) Familial adenomatous polyposis (FAP) (10) Chronic ulcerative colitis (11) Gout (12) Parkinson’s disease (13) Epilepsy (14) Mental illness / Psychiatric disorders (15) Tuberculosis (16) Hepatitis B / C carrier

(17) Other diseases (please specify)

**Section 4. Personal Medical History**

*(If any condition is marked “Yes,” please complete the corresponding questions to the right. If none apply, please mark “No.”)*

| **Disease** | **(1) Do you have this disease?** | **(2) Is it under control or treated?** | **(3) Treatment method (multiple choices allowed)** | **(4) Do you take medication regularly?** |
| --- | --- | --- | --- | --- |
|  | 0 No / 1 Yes / 2 Unknown | 0 No / 1 Yes / 2 Unknown | 1 Western medicine / 2 Traditional Chinese medicine / 3 Herbal / 4 Secret prescription / 5 Other | 1 Every day / 2 Only when symptoms occur / 3 Only when uncomfortable / 4 No medication / 5 Diet control / 6 No treatment / 7 Regular follow-up or surgery |
| **1. Diabetes** | ☐ | ☐ | ☐ | ☐ |
| **2. Hypertension** | ☐ | ☐ | ☐ | ☐ |
| **3. Hyperlipidemia** | ☐ | ☐ | ☐ | ☐ |
| **4. Heart disease** | ☐ | ☐ | ☐ | ☐ |
| **5. Chronic hepatitis / Liver cirrhosis** | ☐ | ☐ | ☐ | ☐ |
| **6. Kidney disease** | ☐ | ☐ | ☐ | ☐ |
| **7. Gout** | ☐ | ☐ | ☐ | ☐ |
| **8. Obesity** | ☐ | ☐ | ☐ | ☐ |
| **9. Osteoporosis** | ☐ | ☐ | ☐ | ☐ |
| **10. Tuberculosis** | ☐ | ☐ | ☐ | ☐ |
| **11. Psychiatric disorders** | ☐ | ☐ | ☐ | ☐ |
| **12. Epilepsy** | ☐ | ☐ | ☐ | ☐ |
| **13. Chronic ulcerative colitis** | ☐ | ☐ | ☐ | ☐ |
| **14. Colorectal polyps** | ☐ | ☐ | ☐ | ☐ |
| **15. Familial adenomatous polyposis (FAP)** | ☐ | ☐ | ☐ | ☐ |
| **16. Hereditary non-polyposis colorectal cancer (HNPCC)** | ☐ | ☐ | ☐ | ☐ |
| **17. Bone spurs** | ☐ | ☐ | ☐ | ☐ |
| **18. Other neurological diseases (e.g., brain degeneration)** | ☐ | ☐ | ☐ | ☐ |
| **19. Gallstones / Urinary stones** | ☐ | ☐ | ☐ | ☐ |
| **20. Pneumonia** | ☐ | ☐ | ☐ | ☐ |
| **21. Chronic obstructive pulmonary disease (COPD)** | ☐ | ☐ | ☐ | ☐ |

**Bone Health–Related Questions**

| **Question** | **Response Options** |
| --- | --- |
| **1. Have you ever had a bone fracture?** | ☐ No ☐ Yes |
| **2. Have your parents ever had a bone fracture due to osteoporosis?** | ☐ No ☐ Yes |
| **3. Have you ever taken glucocorticoids?** (regular use > 3 months) | ☐ No ☐ Yes |
| **4. Have you ever had rheumatoid arthritis?** | ☐ No ☐ Yes |

**Section 5. Medical History for Women *(Females participants only)***

| **Question** | | Response Options / Description |
| --- | --- | --- |
| **1. Menstrual history** | | Age at menarche: ___ years (☐ 99 = Unknown). Is your menstrual cycle regular? ☐ No ☐ Yes, every ___ days |
| **2. Have you reached menopause?** | | ☐ No ☐ Yes, reason for menopause: ☐ Oophorectomy (age ___) ☐ Hysterectomy (age ___) ☐ Natural menopause (age ___) |
| **3. Are you currently using hormone replacement therapy (HRT)?** | | ☐ No ☐ Yes, started at age ___, used for ___ years, reason for use: _______ |
| **4. Are you aware that the government provides free breast and cervical cancer screening for women aged 45 to 69 years?** | | ☐ Yes ☐ No ☐ Not sure |
| **5. Have you received a breast examination within the past two years?** | | ☐ None ☐ Mammography ☐ Breast ultrasound ☐ Both ☐ Other: _______ |
| **6. During recent self-breast examinations, have you noticed any abnormalities?** | | ☐ No ☐ Yes ☐ Not examined |
| **7. Pregnancy history** | | Pregnant___ times; age at first pregnancy: ___ years; Number of live births: ___; Number of miscarriages: ___ |
| **8. Have you ever taken oral contraceptives?** | | ☐ No ☐ Yes, started at age ___, used for ___ years |
| **9. Pregnancy and delivery history** | | Please complete the following information |
| **Birth Order** | **Age at Delivery** | Infant Feeding Method |
| **First birth** | **___ years** | ☐ Breastfeeding ☐ Formula feeding |
| **Second birth** | **___ years** | ☐ Breastfeeding ☐ Formula feeding |
| **Third birth** | **___ years** | ☐ Breastfeeding ☐ Formula feeding |
| **Last birth** | **___ years** | ☐ Breastfeeding ☐ Formula feeding |

**Section 6. Frailty Assessment**

**Section 6.1 Frailty Evaluation (SOF Method)**

| **Indicator** | **Frailty Assessment Question** | **Response / Scoring** | **Scoring and Referral Suggestion** |
| --- | --- | --- | --- |
| **1. Unintentional weight loss** | Have you unintentionally lost more than 3 kg (about 5% of body weight) in the past year? (If “yes,” ask: about how many kilograms?) | ☐ Yes (1 point) ☐ No (0 points) | (1) If any one item = “Yes,” the individual is classified as *pre-frail*.  (2) If two or more items = “Yes,” the individual is classified as *frail* and should be referred to a local health or long-term care management program.  If “Yes,” refer for comprehensive geriatric assessment and possible long-term care support (e.g., “Preventive Long-Term Care Service 2.0”). |
| **2. Reduced lower-limb function** | Are you unable to rise from a chair five times without using your hands? | ☐ Yes (1 point) ☐ No (0 points) |
| **3. Low energy / fatigue** | In the past week, have you felt unusually tired or had little energy to do things (≥3 days)? | ☐ Yes (1 point) ☐ No (0 points) |

**Section 6.2 Falls**

| **Question** | **Response Options** | **Referral Suggestion** |
| --- | --- | --- |
| **In the past year, have you fallen two or more times?** | ☐ Yes (1 point) ☐ No (0 points) | If “Yes,” recommend fall-prevention intervention. |

**Section 6.3 Depression Screening**

| **Question** | **Response Options** | **Scoring / Referral Suggestion** |
| --- | --- | --- |
| **1. In the past two weeks, have you often felt down, depressed, or hopeless?** | ☐ Yes (1 point) ☐ No (0 points) | If both items = “Yes,” counseling is recommended. |
| **2. In the past two weeks, have you felt little interest or pleasure in doing things?** | ☐ Yes (1 point) ☐ No (0 points) |

**Section 7. Change in Vegetarian Dietary Habits**

*(For participants who are vegetarians and have changed their dietary habits)*

| **Question** | **Response Options** |
| --- | --- |
| **1. What type of vegetarian diet did you switch to?** | ☐ 0. Vegan (consumes only fruits and vegetables)  ☐ 1. Lacto-vegetarian (consumes dairy products but not eggs)  ☐ 2. Ovo-vegetarian (consumes eggs but not dairy) ☐ 3. Lacto-ovo vegetarian (consumes both dairy and eggs)  ☐ 4. Semi-vegetarian (accepts vegetarian food but excludes meat)  ☐ 5. Pescatarian (consumes seafood but not meat) |
| **2. How long have you maintained this dietary habit?** | ☐ 0. Less than 1 year ☐ 1. 1–5 years ☐ 2. 5–10 years ☐ 3. 10–15 years ☐ 4. More than 15 years |
| **3. What is your reason for adopting a vegetarian diet?** | ☐ 0. Health reasons ☐ 1. Environmental reasons ☐ 2. Family influence ☐ 3. Religious or cultural reasons ☐ 4. Other: __________ |
| **4. Which foods do you consume most frequently? (Please select up to 3)** | ☐ 1. Eggs ☐ 2. Milk ☐ 3. Grains ☐ 4. Vegetables ☐ 5. Soy products ☐ 6. Fruits ☐ 7. Bread ☐ 8. Spicy food ☐ 9. Vegetarian dishes ☐ 10. Seaweed |

**Section 8. Feedback and Suggestions**

| **Question** | **Response Options / Description** |
| --- | --- |
| **1. How did you find out about today's event?** | ☐ 1. Notification from the Public Health Center ☐ 2. Village Chief’s Announcement ☐ 3. Neighborhood Notice ☐ 4. Newspaper ☐ 5. Passing by and decided to join ☐ 6. Public Health Bureau Website ☐ 7. Hospital Notice ☐ 8. Other (please specify): __________ |
| **2. Education Level** | ☐ 1. Graduate School or above ☐ 2. College/University ☐ 3. Senior High/Vocational School ☐ 4. Junior High School ☐ 5. Elementary School ☐ 6. Literate ☐ 7. Illiterate |
| **3. Are you satisfied with today’s service?** | ☐ 1. Very Satisfied ☐ 2. Satisfied ☐ 3. Neutral ☐ 4. Dissatisfied ☐ 5. Very Dissatisfied  **Please describe the reasons for your satisfaction or dissatisfaction:** ______________________________________ |
| **4. If there are similar health screening events in the future, would you participate again?** | ☐ 1. Yes ☐ 2. No Why? __________________________________________ |
| **5. Would you recommend this activity to your relatives or friends?** | ☐ 1. Yes ☐ 2. No Why? __________________________________________ |
| **6. Are you willing to participate in future health education activities organized by the Public Health Bureau?** | ☐ 1. Yes ☐ 2. No Why? __________________________________________ |
| **7. If you are willing to receive health-related newsletters from Daichung Hospital via email, please write your email address :** | __________________________________________ |

**Interview Record**

*(To be completed by the interviewer)*

| **Question** | **Response Options / Description** |
| --- | --- |
| **1. Language used by the respondent** | ☐ 1. Mandarin ☐ 2. Taiwanese (Min Nan) ☐ 3. Hakka ☐ 4. Indigenous language: __________ ☐ 5. Other: __________ |
| **2. Level of cooperation** | ☐ 1. Very cooperative ☐ 2. Cooperative ☐ 3. Average ☐ 4. Uncooperative ☐ 5. Very uncooperative, reason: __________ |
| **3. Level of comprehension of the questionnaire** | ☐ 1. Fully understood ☐ 2. Mostly understood ☐ 3. Partly understood ☐ 4. Did not understand, reason: __________ |
| **4. Additional comments by interviewer** | __________________________________________ |

**Interviewer’s signature:** _______________________
